# Supplementary material
Source: Springer Nature journal article supplement (https://www.springermedizin.de/resource/supplementary/12936_2014_3664_MOESM3_ESM.pdf/9546136)

## Quinine + Primaquine 0.25mg/kg

Median (range) gametocytaemia  
48 (6 to 324) h

## Quinine alone

Median (range) gametocytaemia  
216 (6 to 624) h

0 100 200 300 400 500 600 700  
Hours

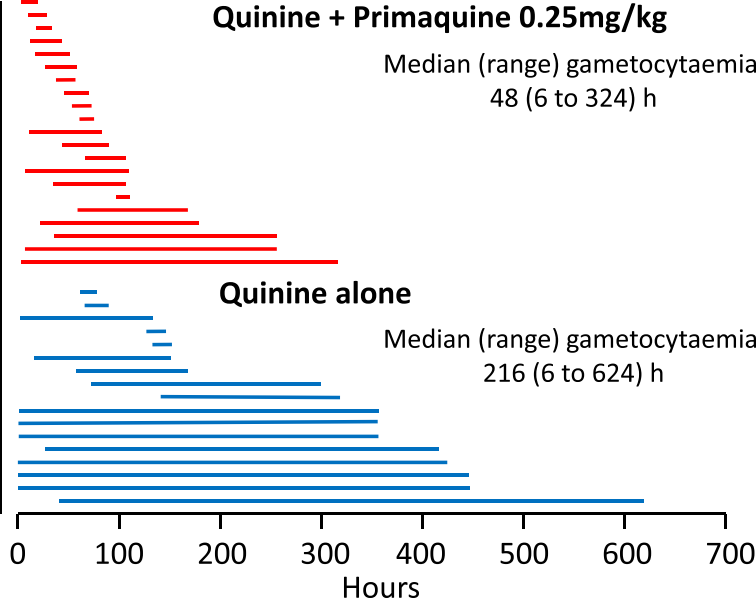

Supplement: MOESM3 [file 9546136]
